# Supplementary material for: Reconstructing the Origins and Dispersal of the Polynesian Bottle Gourd (Lagenaria siceraria)
Source: Oxford University Press journal article supplement (doi:10.1093/molbev/msj092), 2006-01-09
Supplement: msj092_Supplementary_Data.zip [file msj092_Supplementary_Data.zip]

**Supplementary Material**

**Table S1**  
**Full Bottle Gourd (*Lagenaria siceraria*) Sample Details**

| Region    | Cultivar Code | Location (Cultivar)        | Source <sub>a</sub>                                                           | Representative Individual |
|-----------|---------------|----------------------------|-------------------------------------------------------------------------------|---------------------------|
| Asia      | 020(1)Ind     | Indonesia                  | Charles Heiser, Indiana University, Bloomington, Indiana, USA                 | 020(1)Ind-03              |
| Asia      | 020(2)Ind     | Indonesia                  | Charles Heiser, Indiana University, Bloomington, Indiana, USA                 | 020(2)Ind-02              |
| Asia      | 061Ind        | India                      | Charles Heiser, Indiana University, Bloomington, Indiana, USA                 | 061Ind-01                 |
| Asia      | 101Ind        | India                      | Charles Heiser, Indiana University, Bloomington, Indiana, USA                 | 101Ind-01                 |
| Asia      | 111Mal        | Malaysia                   | Charles Heiser, Indiana University, Bloomington, Indiana, USA                 | 111Mal-01                 |
| Asia      | 149Phi        | Philippines                | Charles Heiser, Indiana University, Bloomington, Indiana, USA                 | 149Phi-01                 |
| Asia      | 157Phi        | Philippines                | Charles Heiser, Indiana University, Bloomington, Indiana, USA                 | 157Phi-01                 |
| Asia      | 159Ind        | India                      | Charles Heiser, Indiana University, Bloomington, Indiana, USA                 | 159Ind-02                 |
| Asia      | 161Mal        | Malaysia                   | Charles Heiser, Indiana University, Bloomington, Indiana, USA                 | 161Mal-02                 |
| Asia      | 174Phi        | Philippines                | Charles Heiser, Indiana University, Bloomington, Indiana, USA                 | 174Phi-01                 |
| Asia      | 188Tha        | Thailand                   | Charles Heiser, Indiana University, Bloomington, Indiana, USA                 | 188Tha-02                 |
| Asia      | 195           | Yuwa-machi, Japan          | Mike Burtenshaw, The Open Polytechnic of New Zealand, Lower Hutt, New Zealand | 195-08C                   |
| Asia      | AK            | Akita, Japan               | Peter Matthews, National Museum of Ethnology, Osaka, Japan                    | AK-01                     |
| Polynesia | 183           | Bay of Plenty, New Zealand | Mike Burtenshaw, The Open Polytechnic of New Zealand, Lower Hutt, New Zealand | 183-23C                   |

Table S1 continued...

|           |           |                                       |                                                                                                                                        |              |
|-----------|-----------|---------------------------------------|----------------------------------------------------------------------------------------------------------------------------------------|--------------|
| Polynesia | BR        | New Zealand (Bottle Ruku)             | Mike Burtenshaw, The Open Polytechnic of New Zealand, Lower Hutt, New Zealand                                                          | BR-06        |
| Polynesia | GA        | New Zealand (Gourd 'A')               | Richard Cross, New Zealand Institute for Crop and Food Research, Lincoln, New Zealand (authenticated by John Palmer, Christchurch)     | GA-02C       |
| Polynesia | GD        | New Zealand (Gourd 'D')               | Richard Cross, New Zealand Institute for Crop and Food Research, Lincoln, New Zealand (authenticated by John Palmer, Christchurch)     | GD-03C       |
| Polynesia | MA        | New Zealand (Māori Gourd (1973-1974)) | Steve Lewthwaite, New Zealand Institute for Crop and Food Research, Pukekohe, New Zealand (authenticated by John Palmer, Christchurch) | MA-01        |
| Polynesia | MG        | New Zealand (Māori Gourd)             | Richard Cross, New Zealand Institute for Crop and Food Research, Lincoln, New Zealand (authenticated by John Palmer, Christchurch)     | MG-01        |
| Polynesia | NB        | New Zealand (New Zealand Bottle)      | Mike Burtenshaw, The Open Polytechnic of New Zealand, Lower Hutt, New Zealand                                                          | NB-04        |
| Polynesia | NP        | New Zealand (Nga Puhi)                | Mike Burtenshaw, The Open Polytechnic of New Zealand, Lower Hutt, New Zealand                                                          | NP-06        |
| Americas  | 006Cos    | Costa Rica                            | Charles Heiser, Indiana University, Bloomington, Indiana, USA                                                                          | 006Cos-02    |
| Americas  | 027Ecu    | Ecuador                               | Charles Heiser, Indiana University, Bloomington, Indiana, USA                                                                          | 027Ecu-03    |
| Americas  | 035BArg   | Argentina                             | Charles Heiser, Indiana University, Bloomington, Indiana, USA                                                                          | 035BArg-03   |
| Americas  | 036(1)Per | Peru                                  | Charles Heiser, Indiana University, Bloomington, Indiana, USA                                                                          | 036(1)Per-03 |
| Americas  | 036(2)Per | Peru                                  | Charles Heiser, Indiana University, Bloomington, Indiana, USA                                                                          | 036(2)Per-02 |
| Americas  | 037Per    | Peru                                  | Charles Heiser, Indiana University, Bloomington, Indiana, USA                                                                          | 037Per-03    |
| Americas  | 051Bra    | Brazil                                | Charles Heiser, Indiana University, Bloomington, Indiana, USA                                                                          | 051Bra-01    |
| Americas  | 059Cos    | Costa Rica                            | Charles Heiser, Indiana University, Bloomington, Indiana, USA                                                                          | 059Cos-01    |
| Americas  | 079Mex    | Mexico                                | Charles Heiser, Indiana University, Bloomington, Indiana, USA                                                                          | 079Mex-01    |
| Americas  | 093Hop    | Hopi, Arizona, USA                    | Charles Heiser, Indiana University, Bloomington, Indiana, USA                                                                          | 093Hop-01    |
| Americas  | 152Mex    | Mexico                                | Charles Heiser, Indiana University, Bloomington, Indiana, USA                                                                          | 152Mex-01    |
| Americas  | 153Mex    | Mexico                                | Charles Heiser, Indiana University, Bloomington, Indiana, USA                                                                          | 153Mex-01    |

Table S1 continued...

|          |        |                  |                                                                               |           |
|----------|--------|------------------|-------------------------------------------------------------------------------|-----------|
| Americas | 195Per | Peru             | Charles Heiser, Indiana University, Bloomington, Indiana, USA                 | 195Per-01 |
| Americas | 315Bra | Brazil           | Charles Heiser, Indiana University, Bloomington, Indiana, USA                 | 315Bra-01 |
| Americas | 407Bra | Brazil           | Charles Heiser, Indiana University, Bloomington, Indiana, USA                 | 407Bra-01 |
| Africa   | 291Mad | Madagascar       | Charles Heiser, Indiana University, Bloomington, Indiana, USA                 | 291Mad-02 |
| Africa   | MR     | Africa (Maranka) | Mike Burtenshaw, The Open Polytechnic of New Zealand, Lower Hutt, New Zealand | MR-05C    |

<sup>a</sup> Samples obtained from Charles Heiser are described in Heiser (1973a)

**Table S2**  
**ISSR and TAIL PCR Primer Sequences**

| Type                                        | Marker                  | Primer Name | Primer Sequence (5'-3')  |
|---------------------------------------------|-------------------------|-------------|--------------------------|
| ISSR <sub>a</sub>                           | BOP19_31                | #846        | CACACACACACACACART       |
|                                             | BOP19_35                | #812        | GAGAGAGAGAGAGAGAA        |
|                                             | BR01_19                 | #808        | AGAGAGAGAGAGAGAGC        |
|                                             | MR06_24 and<br>BOP19_27 | #823        | TCTCTCTCTCTCTCTCC        |
|                                             |                         |             |                          |
| TAIL<br>(Arbitrary Degenerate) <sub>b</sub> |                         | TAIL-AD1    | NGTCGASWGANAWGAA         |
|                                             |                         | TAIL-AD2    | GTNCGASWCANAWGTT         |
|                                             |                         | TAIL-AD3    | WGTGNAGWANCANAGA         |
| TAIL (Specific)                             | BOP19_31                | SP31-1L     | TTGTATCCATTCAAAAGTTTCC   |
|                                             |                         | SP31-2L     | CAATAACAAAGAGTGGACTGG    |
|                                             |                         | SP31-3L     | TGATTACAGGAAACGAGGAGT    |
|                                             |                         | SP31-1R     | CCAGTCCACTCTTTTGTATTG    |
|                                             |                         | SP31-2R     | GGAACTTTTGAATGGATACAA    |
|                                             |                         | SP31-3R     | TTTTGTACTCTGCCACGGTT     |
|                                             | BOP19_35                | SP35-1L     | TGGTATAAAAGTAAGACTCTA    |
|                                             |                         | SP35-2L     | GTCTTTTGAAGTAGCGTCGG     |
|                                             |                         | SP35-3L     | GGGCTTGTTTTATCTACTTGTT   |
|                                             |                         | SP35-1R     | TAGAGTCCTTACTTTTATACCA   |
|                                             |                         | SP35-2R     | TTCTCGTTTTCTTTCTCCATT    |
|                                             |                         | SP35-3R     | CCTCCCTCGGTCATCTTCTA     |
|                                             | BR01_19                 | SP19-1L     | AAAAGTTCGCCCCCAGCCG      |
|                                             |                         | SP19-2L     | GCCGAAAATGCCAAATCACCA    |
|                                             |                         | SP19-3L     | TCGGATGAACTACTGAAATGA    |
|                                             |                         | SP19-1R     | GTGAGGAAAGGAAGAGAGAG     |
|                                             |                         | SP19-2R     | CGACTTTTCCGTGTGTGCGA     |
|                                             |                         | SP19-3R     | TGGTGATTTGGCATTTCGGC     |
|                                             | MR06_24                 | SP24-1L     | TTACTGTCTGCTCCTTCAAATC   |
|                                             |                         | SP24-2L     | AATAGAAATAAAGAGAGACCGA   |
|                                             |                         | SP24-3L     | CTGCTTCTATGGCTTTCTTCTT   |
|                                             |                         | SP24-1R     | TCGGGGAAGTGGAGATTGTT     |
|                                             |                         | SP24-2R     | TCAAGGAGAGAGTAAATGTTA    |
|                                             |                         | SP24-3R     | GAGGAGAAGGATAAAAACATAC   |
|                                             | BOP19_27                | SP27-1L     | GTCTGACTTCATCATTTTTATTTA |
|                                             |                         | SP27-2L     | AACTATTTCAAACACTTTAGAAG  |
|                                             |                         | SP27-3L     | TAAACCAAACACACCTTGAATAA  |
|                                             |                         | SP27-1R     | TGAAGTTTTTCGGGTAGAGGG    |
|                                             |                         | SP27-2R     | TTATTCAAGGTGTGTTTGGTTTA  |
|                                             |                         | SP27-3R     | CTTCTAAAGTGTTTTGAAATAGTT |

<sub>a</sub> From University of British Columbia (UBC ISSR Primer Set #9)

<sub>b</sub> From Okamoto and Hirochika (2000)

**Table S3**  
**Chloroplast and Nuclear Bottle Gourd PCR Markers**

| Location    | Marker                       | Expected Size of<br>PCR Product (bp) | PCR Annealing<br>Temperature | Primer Name           | Primer Use <sup>a</sup> | Primer Sequence (5'-3') |
|-------------|------------------------------|--------------------------------------|------------------------------|-----------------------|-------------------------|-------------------------|
| Chloroplast | <i>trnC-trnD<sub>b</sub></i> | 2800                                 | 56°C                         | trnC_F <sub>b</sub>   | P                       | CCAGTTCAAATCTGGGTGTC    |
|             |                              |                                      |                              | trnD_R <sub>b</sub>   | P                       | GGGATTGTAGTTCAATTGGT    |
|             |                              |                                      |                              | psbM_2R <sub>b</sub>  | S                       | TTCTTGCAATTTATTGCTACTGC |
|             |                              |                                      |                              | psbM_3F               | S                       | TGCTTTTTCATTTTCTTATCTTC |
| Chloroplast | <i>trnS-trnG</i>             | 1000                                 | 50°C                         | CCSSR02F <sub>c</sub> | P                       | AATCCTGGACGTGAAGAATAA   |
| Nuclear     | BOP19_27                     | 740                                  | 52°C                         | trnG_R                | P, S                    | AAACTATATCCGCTACAATGC   |
|             |                              |                                      |                              | BOP19_27_L            | P                       | CAGATGTTTTGGTTTGGGGAT   |
| Nuclear     | BOP19_31                     | 759                                  | 52°C                         | BOP19_27_R            | P, S                    | CTCACTCCTTTTCCATACCAT   |
|             |                              |                                      |                              | BOP19_31_L            | P, S                    | GATAGGGAAGAAAAATAGAAAAG |
| Nuclear     | BOP19_35                     | 1014                                 | 52°C                         | BOP19_31_R            | P                       | CGTGAAGAAACAAAAAGGAAC   |
|             |                              |                                      |                              | BOP19_35_L            | P, S                    | GAGTGAGATGAACAAAGAAAGA  |
| Nuclear     | BR01_19                      | 641                                  | 52°C                         | BOP19_35_R            | P                       | TCCAGACAAACCAAGAAACCA   |
|             |                              |                                      |                              | BR01_19_L             | P                       | CCCTCTTCACCATCTTCTTC    |
| Nuclear     | MR06_24                      | 738                                  | 52°C                         | BR01_19_R             | P, S                    | GAAATATCGTGCCTGTAAAATAT |
|             |                              |                                      |                              | MR06_24_L             | P, S                    | CCATTTTGACAGTATGCCATCT  |
|             |                              |                                      |                              | MR06_24_R             | P                       | GTGCTGCTGCTTCAGTTTCA    |

<sup>a</sup> P = PCR primer; S = sequencing primer

<sup>b</sup> From Lee and Wen (2004)

<sup>c</sup> From Chung and Staub (2003)

**Figure S1**  
**Spectronet Network for Bottle Gourd Nuclear Data**

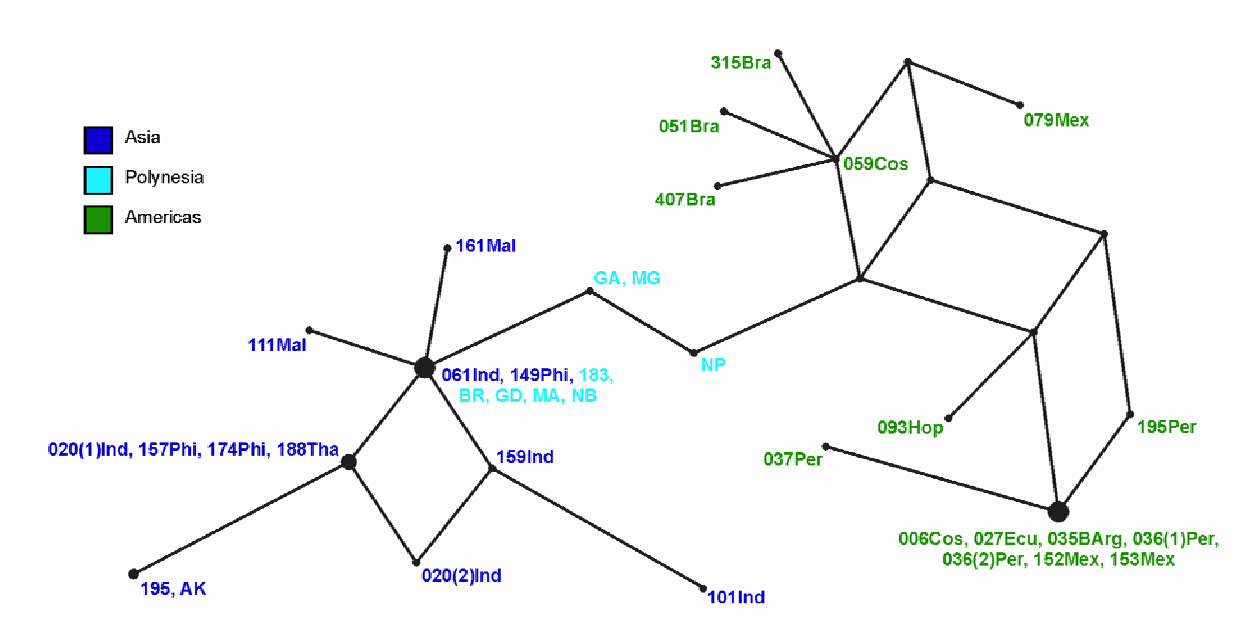

**Fig. S1** — Relationships between bottle gourd cultivars and their regions of origin were investigated through construction of a Spectronet network (Huber et al. 2002). Each informative character in the aligned data was recoded as two genotype characters (e.g. a heterozygous SNP ‘Y’ was recoded as ‘CT’). Gap data were recoded as nucleotide data (e.g. a homozygous deletion ‘00’ was recoded as ‘CC’, a homozygous insertion ‘11’ as ‘TT’, and a heterozygous indel ‘01’ as ‘CT’). Cultivar codes are explained in Tables 1 and S1 (African samples are not included). Nodes in the network represent genotypes, and sets of parallel edges represent a particular split (bipartition of the data). Edge lengths are proportional to the number of characters that display that split (only splits with two or more supporting characters are displayed). Multiple individuals at a single node have identical genotypes, and the size of each node is proportional to the number of individuals with that genotype. Asian and American samples each comprise a separate group ( $F_{ST} = 0.412$ ;  $F_{IS} = 0.917$ ), with Polynesian samples largely grouping with Asian samples ( $F_{ST} = 0.251$ ;  $F_{IS} = 0.684$ ) as opposed to the American samples ( $F_{ST} = 0.311$ ;  $F_{IS} = 0.742$ ). The three Polynesian samples which are closest to the American samples (GA, MG, NP) are those which possess the unique American allele for the BR01\_19 marker (see Fig. 3 and Supplementary Table S4).

## References

- Chung, S.-M., and J. E. Staub. 2003. The development and evaluation of consensus chloroplast primer pairs that possess highly variable sequence regions in a diverse array of plant taxa. *Theor. Appl. Genet.* **107**:757-767.
- Heiser, C. B. 1973a. Variation in the bottle gourd. Pp. 121-128 in B. J. Meggers, E. S. Ayensu, and W. D. Duckworth, eds. *Tropical forest ecosystems in Africa and South America: a comparative review*. Smithsonian Institution Press, Washington, D.C., USA.
- Huber, K. T., M. Langton, D. Penny, V. Moulton, and M. Hendy. 2002. Spectronet: A package for computing spectra and median networks. *Applied Bioinformatics* **1**:159-161. Program available from <http://awcmee.massey.ac.nz/spectronet/>.
- Lee, C., and J. Wen. 2004. Phylogeny of *Panax* using chloroplast *trnC-trnD* intergenic region and the utility of *trnC-trnD* in interspecific studies of plants. *Mol. Phylogenet. Evol.* **31**:894-903.
- Okamoto, H., and H. Hirochika. 2000. Efficient insertion mutagenesis of *Arabidopsis* by tissue culture-induced activation of the tobacco retrotransposon *Tto1*. *Plant J.* **23**:291-304.
